# Supplementary material for: Delayed tumor-draining lymph node irradiation preserves the efficacy of combined radiotherapy and immune checkpoint blockade in models of metastatic disease
Source: PubMed Central journal article supplement (PMC11217506; doi:10.1038/s41467-024-49873-y), 2024-06-29
Supplement: 41467_2024_49873_MOESM1_ESM.pdf [file 41467_2024_49873_MOESM1_ESM.pdf]

## **Supplementary Information**

### **Delayed Tumor-Draining Lymph Node Irradiation Preserves the Efficacy of Combined Radiotherapy and Immune Checkpoint Blockade in Models of Metastatic Disease**

Irma Telarovic, Carmen S.M. Yong, Lisa Kurz, Irene Vetrugno, Sabrina Reichl, Alba Sanchez Fernandez, Hung-Wei Cheng, Rona Winkler, Matthias Guckenberger, Anja Kipar, Burkhard Ludewig, Martin Pruschy

#### **Contents**

Supplementary Figure 1. Changes in the tumor immune cell composition following draining lymph node irradiation.

Supplementary Figure 2. Adjuvant draining lymph node irradiation improves regional lymph node control, mitigates the growth of a distant (non-irradiated) tumor and allows for the induction of long-lasting tumor-specific immunity.

Supplementary Figure 3. Adjuvant draining lymph node irradiation improves the treatment response also in the murine MC38 colon carcinoma model.

Supplementary Figure 4. Changes in the draining lymph node immune cell composition following irradiation.

Supplementary Figure 5. Representative sections of irradiated lymph nodes.

Supplementary Figure 6. Irradiation induces changes in the stromal cell compartment of the lymph node and interferes with the CCR7-CCL19/CCL21 immune cell homing axis.

Supplementary Figure 7. Representative flow cytometry gating strategy for the analysis of DCs.

Supplementary Table 1. Antibodies used for flow cytometry and fluorescence activated cell sorting.

Supplementary Table 2. Antibodies used for immunofluorescence.

Supplementary Figure 1

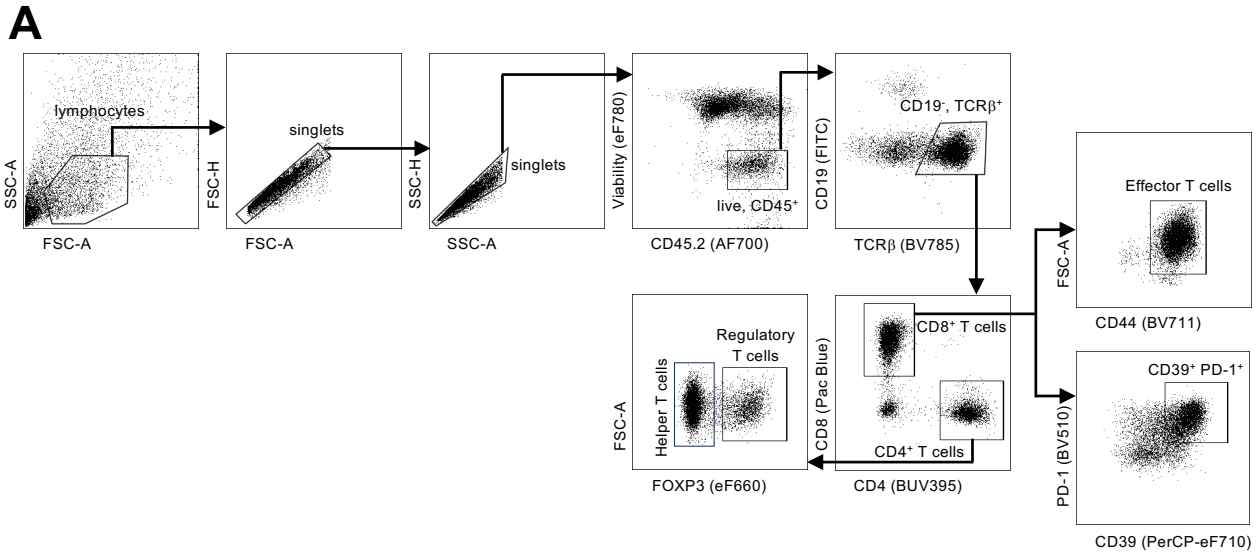

Tumor, days 0-10 after tumor IR

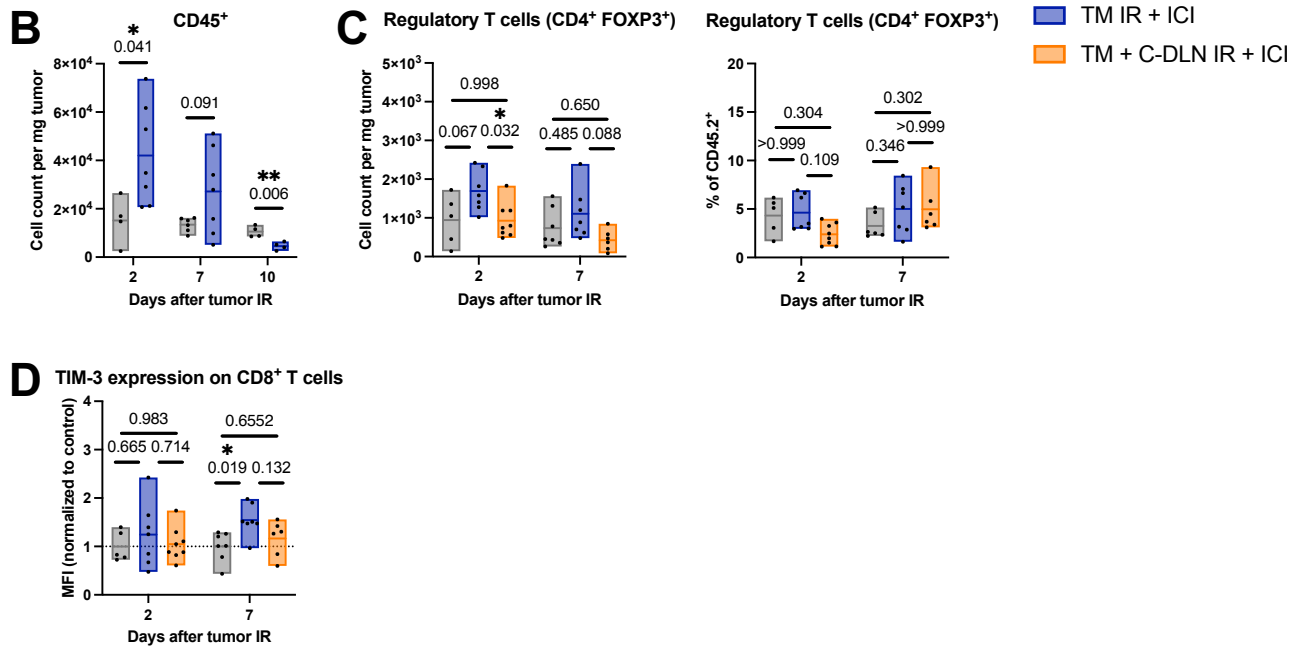

**Supplementary Figure 1. Changes in the tumor immune cell composition following draining lymph node irradiation. (A)** Representative gating strategy for tumor immunophenotyping. Corresponding data is shown in Figure 3, D to H, Figure 4G, and Supplementary Figure 1, B to D. **(B to D)** Immunophenotype of the tumor over 10 days after tumor IR, as described in Figure 3. All groups received  $\alpha$ -CTLA-4. “Sham IR + ICI” group (gray) received sham IR, “TM IR + ICI” group (blue) received tumor IR, and “TM + C-DLN IR + ICI” group (orange) received DLN IR concomitantly to tumor IR. Each dot represents an individual mouse. Floating bars span from the minimal to the maximal value of each group. Line indicates the mean.  $n \geq 4$  mice per group (exact numbers provided in Source Data file). **(B)** CD45<sup>+</sup> cell count per mg tumor. **(C)** Tumor-infiltrating regulatory T cells. Left: Cell count per mg tumor. Right: Percentage of CD45<sup>+</sup> cells. **(D)** TIM-3 expression on CD8<sup>+</sup> T cells on days 2 and 7 after tumor IR, expressed as the geometric mean of the fluorescence intensity (MFI), normalized to the average MFI value of the “Sham IR + ICI” group. Data were tested for normality using the Shapiro-Wilk test. For data following a normal distribution, treatment groups were compared using the two-sided unpaired t test (B) or one-way ANOVA with Holm-Sidak’s multiple comparisons test (C, left and D). For non-normally distributed data, the comparison was performed using the Kruskal-Wallis test with Dunn’s multiple comparisons test (C, right). All p values are displayed, with \*, \*\* and \*\*\* indicating  $p < 0.05$ ,  $p < 0.01$  and  $p < 0.001$ , respectively.

Supplementary Figure 2

**A** Rechallenge of mice cured from B16F10-Luc tumors

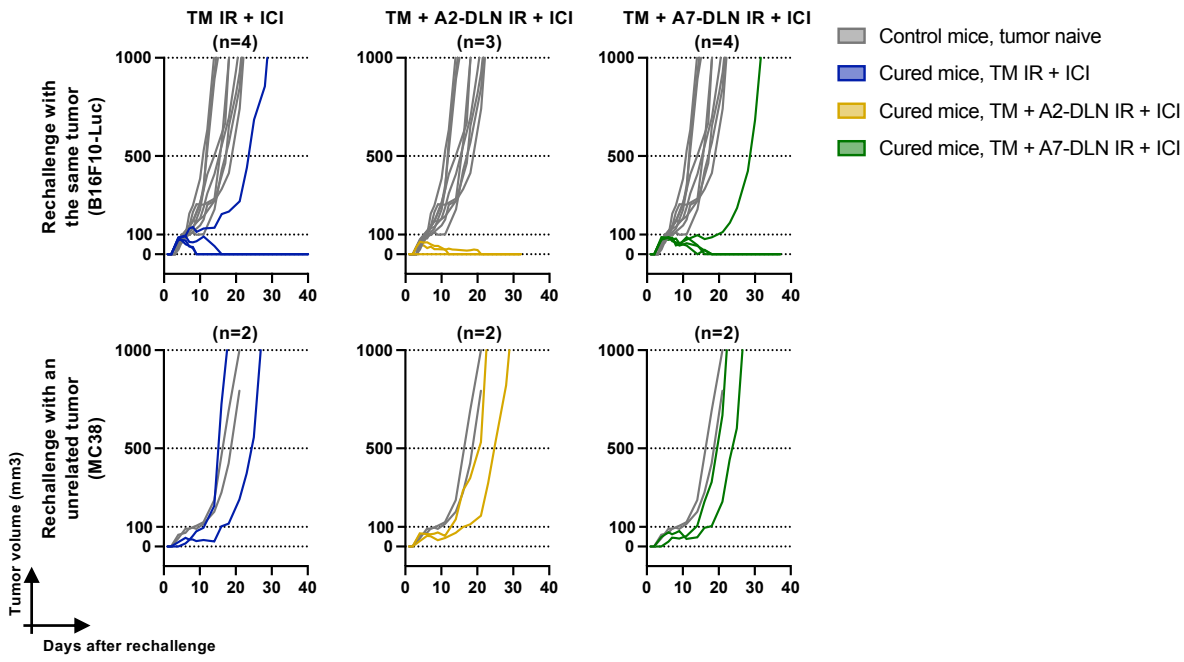

**B** Primary (irradiated) tumor

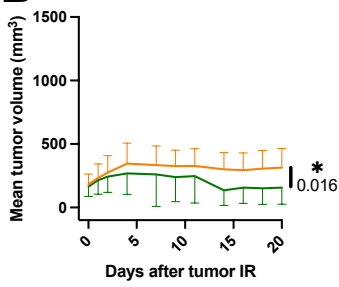

Secondary (abscopal) tumor

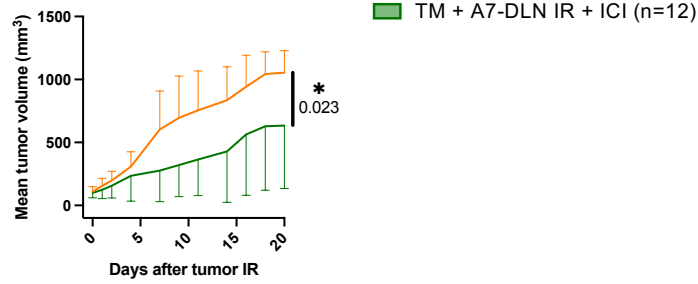

**Supplementary Figure 2. Adjuvant draining lymph node irradiation improves regional lymph node control, mitigates the growth of a distant (non-irradiated) tumor and allows for the induction of long-lasting tumor-specific immunity. (A)**

Individual tumor growth curves in response to the rechallenge with the same (B16F10-Luc, left) or an antigenically unrelated (MC38, right) tumor cell line. Complete responders are shown in blue, yellow and green for “TM IR + ICI”, “TM + A2-DLN IR + ICI” and “TM + A7-DLN IR + ICI” group, respectively. Tumor-naïve control mice are shown in gray. Each line represents an individual mouse. Number of cured mice in each group is indicated in the corresponding graph title. For the naïve control mice, n=8 for the B16F10-Luc group and n=2 for the MC38 group. **(B)** Mean tumor volume curves for primary and secondary tumors of the mice shown in Figure 6, D to H. Error bars represent the standard deviation (SD). Number of mice is indicated in the figure. p values are derived from the comparison of mean tumor volumes on day 20 after IR, using the two-sided Mann-Whitney test (due to the non-normal distribution of the data, as determined by the Shapiro-Wilk test). All p values are displayed, with \*, \*\* and \*\*\* indicating  $p < 0.05$ ,  $p < 0.01$  and  $p < 0.001$ , respectively.

Supplementary Figure 3

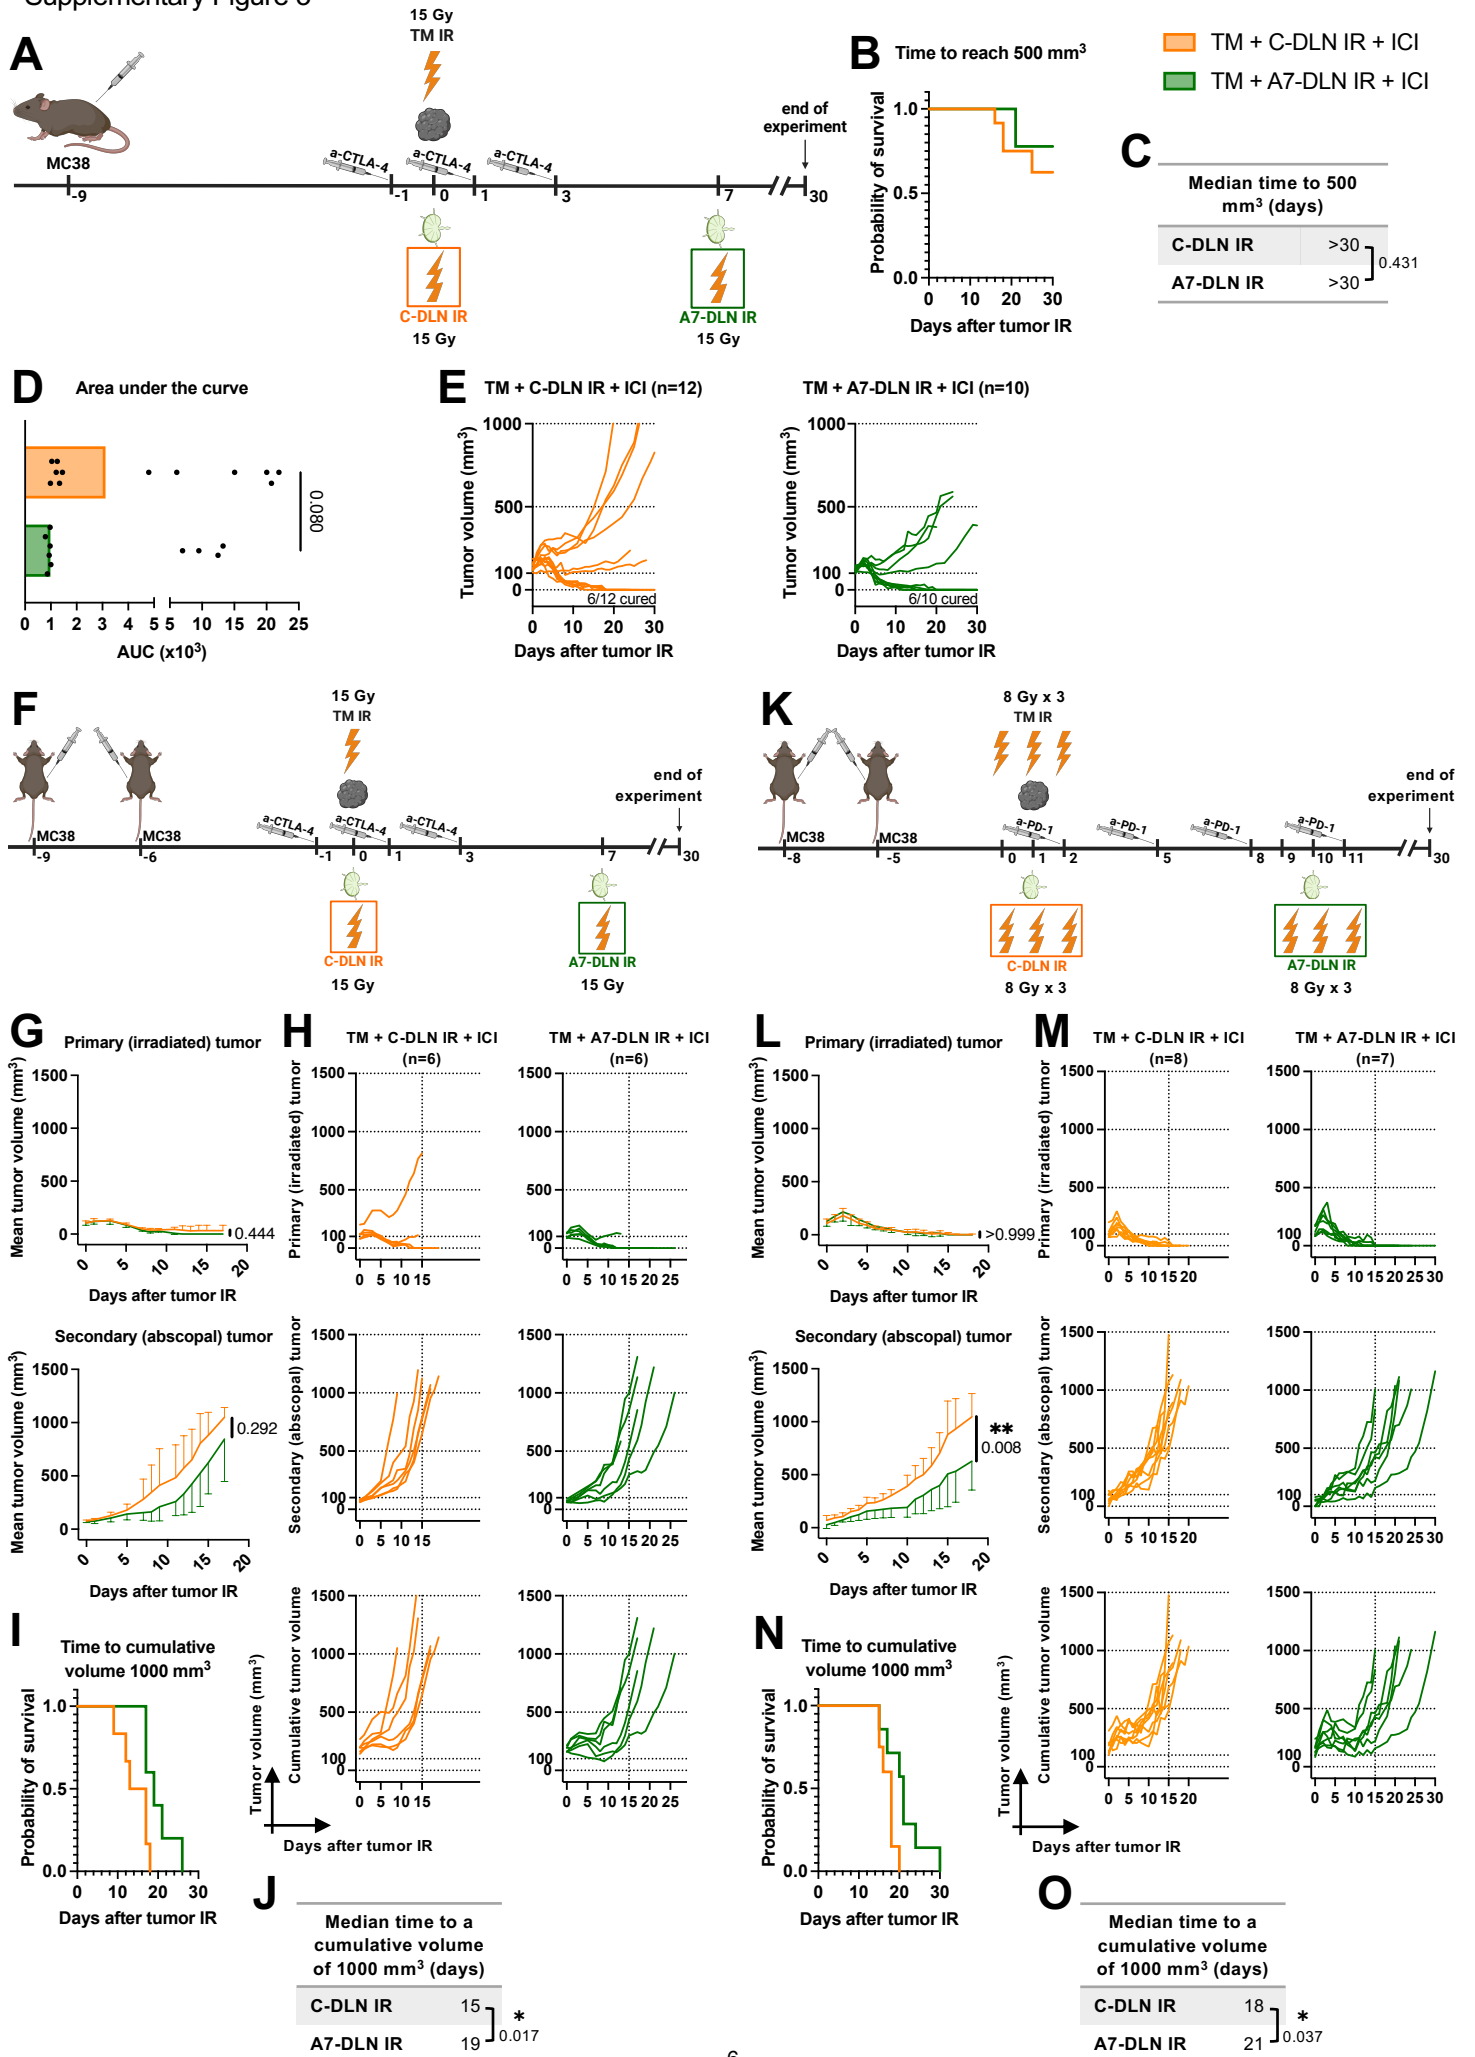

**Supplementary Figure 3. Adjuvant draining lymph node irradiation improves the treatment response also in the murine MC38 colon carcinoma model.** (A) Mice received tumor IR and  $\alpha$ -CTLA-4, as indicated. DLN IR was performed either together with the tumor IR (C-DLN IR, orange), or 7 days thereafter (A7-DLN IR, green). (B to E) Treatment response represented by the Kaplan-Meier survival analysis (B and C), area under the curve (AUC) analysis (D) and individual tumor growth curves (E). Each dot in (D) and each line in (E) represents an individual mouse. Bar width in (D) represents the median value of the corresponding group. Number of mice is indicated in (E). (F) Mice received tumor IR and  $\alpha$ -CTLA-4 as, indicated. DLN IR was performed either together with the tumor IR (C-DLN IR, orange), or 7 days thereafter (A7-DLN IR, green). (G to J) Treatment response represented by the mean tumor volume curves (G), individual tumor growth curves (H) and the Kaplan-Meier survival analysis (I and J). (K) Mice received tumor IR,  $\alpha$ -CTLA-4 and  $\alpha$ -PD-1, as indicated. DLN IR was performed either together with the tumor IR (C-DLN IR, orange), or 7 days thereafter (A7-DLN IR, green). (L to O) Treatment response represented by the mean tumor volume curves (L), individual tumor growth curves (M) and the Kaplan-Meier survival analysis (N and O). Time to reach a cumulative tumor volume (i.e. the sum of the primary and secondary tumor volume on a given day) of 1000 mm<sup>3</sup> was used as the endpoint for Kaplan-Meier analysis. Error bars in (G) and (L) represent the standard deviation (SD). Each line in (H) and (M) represents an individual mouse. Number of mice is indicated in (H) and (M). Data were tested for normality using the Shapiro-Wilk test. For data following a normal distribution, treatment groups were compared using the two-sided unpaired t test (G, bottom and L, bottom). For non-normally distributed data, comparisons were performed using the two-sided Mann-Whitney test (D, G, top and L, top). Logrank test (Mantel-Cox) was used to compare the survival curves in (B), (I) and (N); corresponding p values are displayed in (C), (J) and (O), respectively. All p values are displayed, with \*, \*\* and \*\*\* indicating p<0.05, p<0.01 and p<0.001, respectively. Supplementary Figure 3, panels A, F and K created with BioRender.com, released under a Creative Commons Attribution-NonCommercial-NoDerivs 4.0 International license.

Supplementary Figure 4

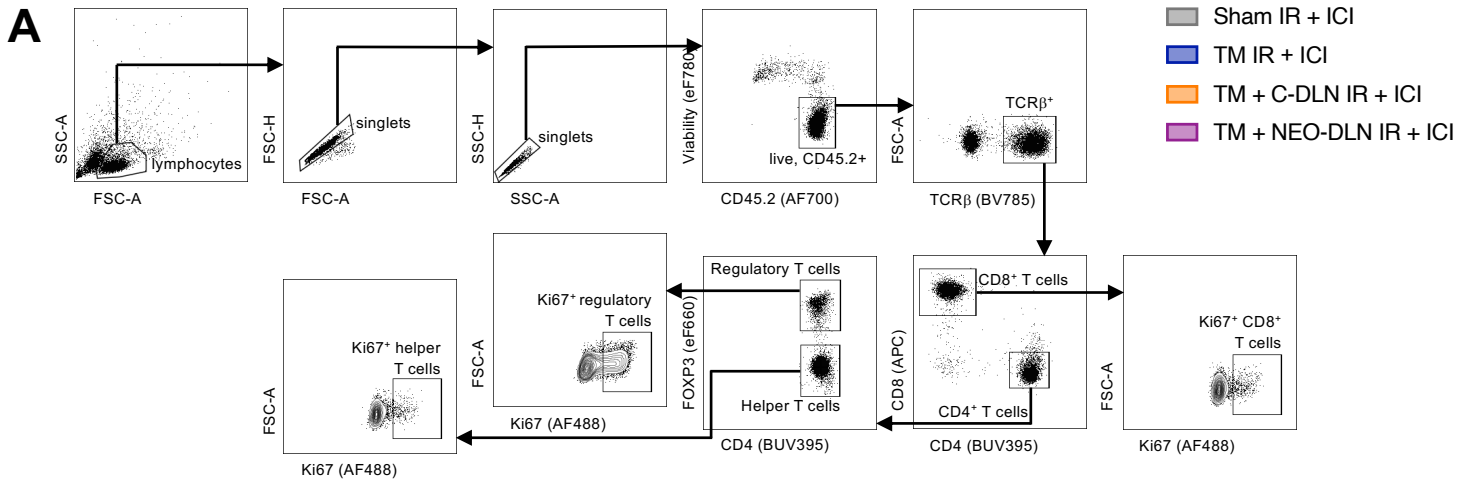

**B** CD8<sup>+</sup> to regulatory T cell ratio, day 4 after tumor IR

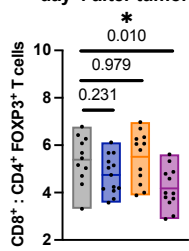

**C** CTLA-4 expression on regulatory T cells, day 4 after tumor IR

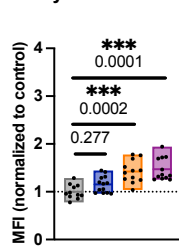

**D**

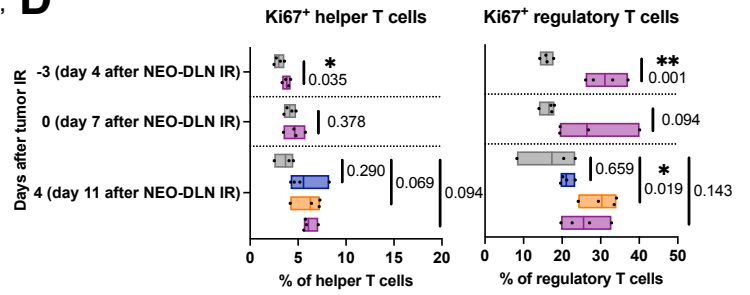



**Supplementary Figure 4. Changes in the draining lymph node immune cell composition following irradiation. (A)**

Representative gating strategy for lymph node immunophenotyping. Corresponding data is shown in Figure 7, B to G, and Supplementary Figure 4, B to D. **(B to D)** Immune cell composition of the DLN in response to IR, as described in Figure 7. All groups received  $\alpha$ -CTLA-4. “Sham IR + ICI” group (gray) received sham IR, “TM IR + ICI” group (blue) received tumor IR, “TM + C-DLN IR + ICI” group (orange) received DLN IR concomitantly to the tumor IR, and “TM + NEO-DLN IR + ICI” group (purple) received DLN IR 7 days prior to tumor IR. Each dot represents an individual mouse. Floating bars span from the minimal to the maximal value of each group. Line indicates the mean.  $n \geq 11$  for (B) and (C), and  $n \geq 3$  mice per group for (D) (exact numbers provided in Source Data file). (B) CD8<sup>+</sup> to regulatory T cell ratio in the DLNs on day 4 after tumor IR. (C) CTLA-4 expression on regulatory T cells on day 4 after tumor IR, expressed as the geometric mean of the fluorescence intensity (MFI), normalized to the average MFI value of the “Sham IR + ICI” group. (D) Percentage of CD4<sup>+</sup> FOXP3<sup>-</sup> helper T cells (left) and CD4<sup>+</sup> FOXP3<sup>+</sup> regulatory T cells (right) in the DLN positive for Ki67. Data were tested for normality using the Shapiro-Wilk test. For data following a normal distribution, treatment groups were compared using the two-sided unpaired t test (B and D, day -3) or one-way ANOVA with Holm-Sidak’s multiple comparisons test (B and D, day 4). For non-normally distributed data, comparisons were performed using the two-sided Mann-Whitney test (D, day 0) or the Kruskal-Wallis test with Dunn’s multiple comparisons test (C). All p values are displayed, with \*, \*\* and \*\*\* indicating  $p < 0.05$ ,  $p < 0.01$  and  $p < 0.001$ , respectively.

Supplementary Figure 5

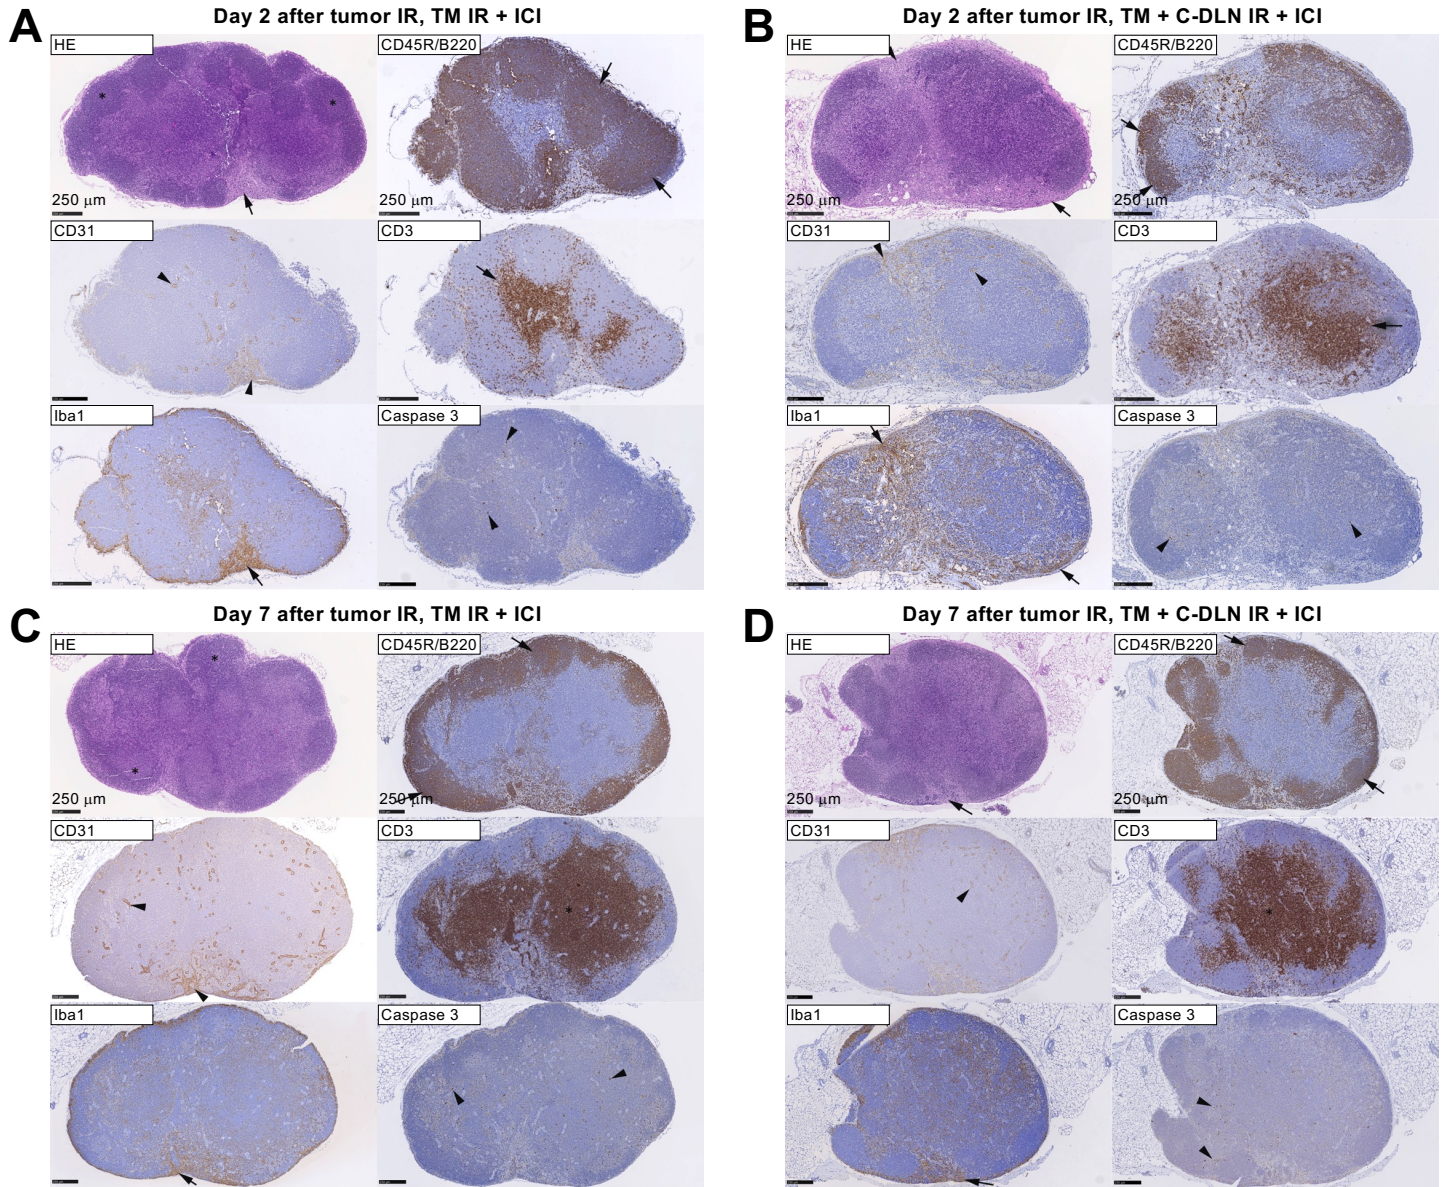

**Supplementary Figure 5. Representative sections of irradiated lymph nodes. (A to D)** Hematoxylin and eosin (HE) stains (top left) and immunohistochemistry, horseradish peroxidase method, hematoxylin counterstain. Bars = 250  $\mu$ m. (A) Sham-irradiated DLN of the “TM IR + ICI” group on day 2 after tumor IR. Normal lymph node with distinct, moderately sized primary follicles (HE: asterisks: primary follicle, arrow: sinus at hilus), with normal distribution of vessels in cortex, medulla and sinuses (CD31: arrowheads). Follicles are cell rich (CD45R/B220: arrows), and there are moderately cellular T cell zones (CD3: arrow). Sinuses contain a low number of macrophages (Iba1: arrow: sinus at hilus). There are a few random apoptotic lymphocytes (caspase 3: arrowheads). (B) Irradiated DLN of the “TM + C-DLN IR + ICI” group on day 2 after tumor IR. The architecture is preserved (HE: arrows: sinuses), with normal distribution of vessels in cortex, medulla and sinuses (CD31: arrowheads). Follicles are small and moderately cellular (CD45R/B220: arrows), and there are moderately cellular T cell zones (CD3: arrow). Sinuses contain moderate numbers of macrophages (Iba1: arrows). There are a few random apoptotic lymphocytes (caspase 3: arrowheads). (C) Sham-irradiated DLN of the “TM IR + ICI” group on day 7 after tumor IR. Normal lymph node with distinct, moderately sized primary follicles (HE: asterisks), with normal distribution of vessels in cortex, medulla and sinuses (CD31: arrowheads). Follicles are cell rich (CD45R/B220: arrows), and there are relatively large T cell zones (CD3: asterisk). Sinuses contain a low number of macrophages (Iba1: arrow: sinus at hilus). There are a few random apoptotic lymphocytes (caspase 3: arrowheads). (D) Irradiated DLN of the “TM + C-DLN IR + ICI” group on day 7 after tumor IR. The architecture is preserved (HE: arrows: sinuses), with normal distribution of vessels in cortex, medulla and sinuses (CD31: arrowheads). Follicles are relatively small and moderately cellular (CD45R/B220: arrows), and there are moderately cellular T cell zones (CD3: asterisk). Sinuses contain moderate numbers of macrophages (Iba1: arrows). There are several individual and small groups of random apoptotic lymphocytes (caspase 3: arrowheads). Representative sections from n=3 mice per treatment group, 2 lymph nodes per mouse.

Supplementary Figure 6

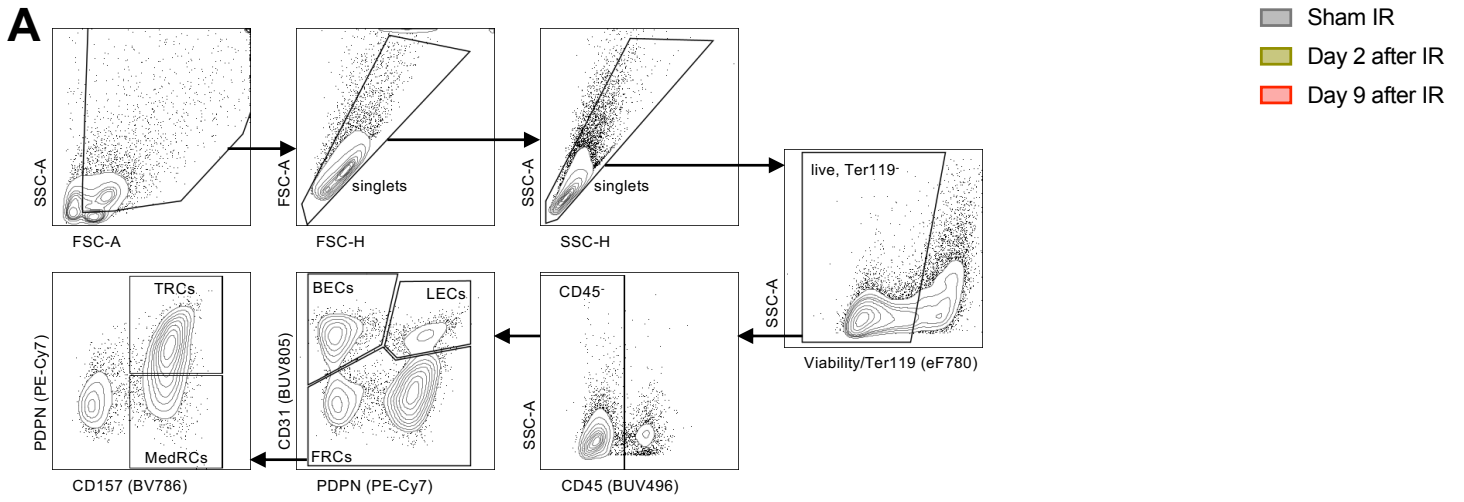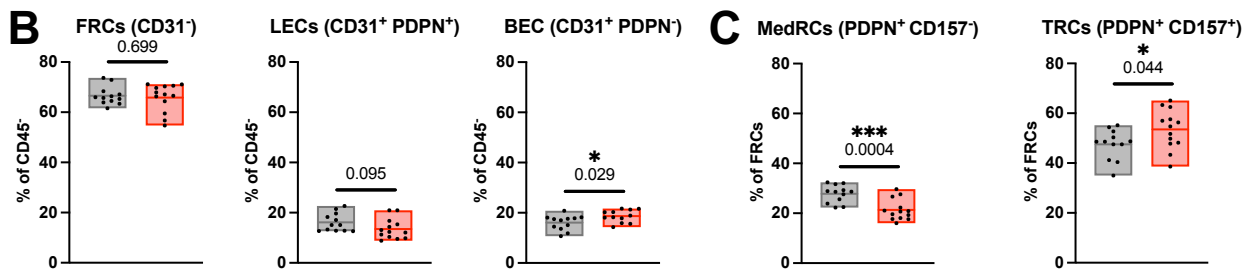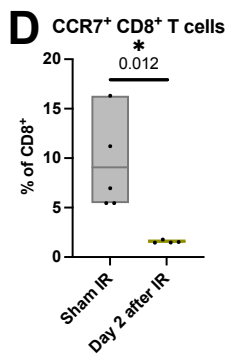

**Supplementary Figure 6. Irradiation induces changes in the stromal cell compartment of the lymph node and interferes with the CCR7-CCL19/CCL21 immune cell homing axis. (A)** Representative flow cytometry gating strategy for the analysis of lymph node stromal cells. Corresponding data is shown in Figure 8, C to E, and Supplementary Figure 6, B and C. **(B to D)** Lymph node stromal cells in response to IR, as described in Figure 8. Each dot represents an individual mouse. Floating bars span from the minimal to the maximal value of each group. Line indicates the mean. n=12 mice for the sham-irradiated group (gray) and n=13 mice for the group which received lymph node IR 9 days prior to analysis (red). (B) Percentages of fibroblastic reticular cells (FRCs), lymphatic endothelial cells (LECs) and blood endothelial cells (BECs) within the CD45<sup>+</sup> compartment. Populations are defined by differential expression of CD31 and podoplanin (PDPN). (C) Percentages of medullary reticular cells (MedRCs) and T zone reticular cells (TRCs) within the FRC compartment. (D) Percentage of CCR7<sup>+</sup> CD8<sup>+</sup> T cells within the CD8<sup>+</sup> T cell compartment. n=5 mice per group. Data were tested for normality using the Shapiro-Wilk test. For data following a normal distribution, treatment groups were compared using the two-sided unpaired t test (B, LECs and BECs, C and D). For non-normally distributed data, the comparison was performed using the two-sided Mann-Whitney test (B). All p values are displayed, with \*, \*\* and \*\*\* indicating p<0.05, p<0.01 and p<0.001, respectively.

Supplementary Figure 7

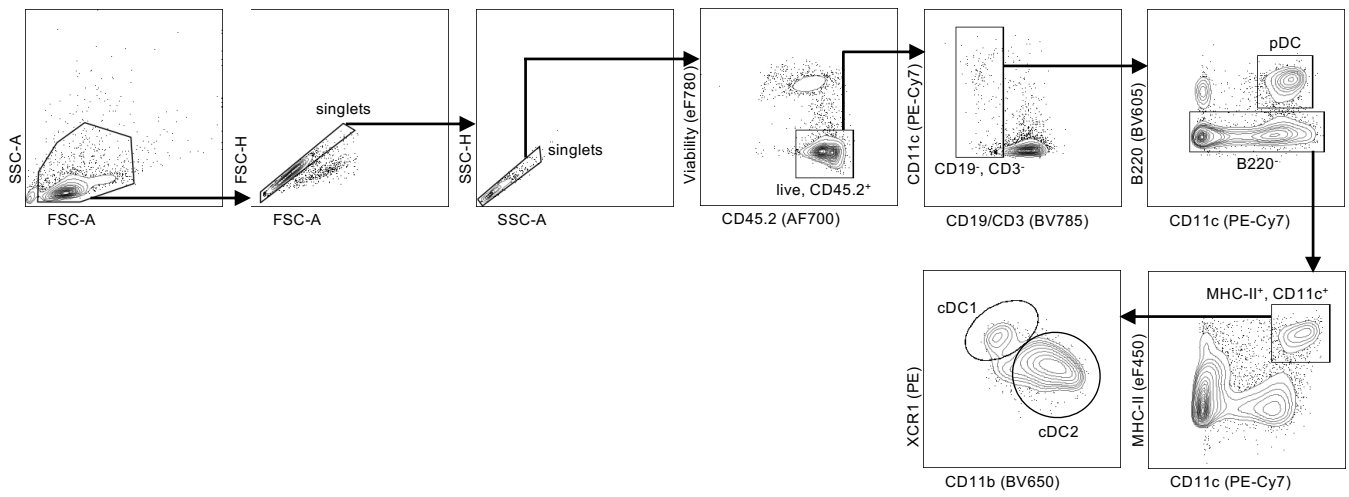

**Supplementary Figure 7. Representative flow cytometry gating strategy for the analysis of DCs.** Corresponding data is shown in Figure 10, C and D.

**Supplementary Table 1. Antibodies used for flow cytometry and fluorescence activated cell sorting.**

| Target         | Clone      | Fluorochrome | Dilution | Reference  | Distributor    |
|----------------|------------|--------------|----------|------------|----------------|
| B220           | RA3-6B2    | BV605        | 200      | 103243     | Biolegend      |
| CCR7           | 4B12       | PE           | 50       | 120105     | Biolegend      |
| CD103          | M290       | BUV805       | 200      | 741948     | BD Biosciences |
| CD103          | M290       | BUV395       | 200      | 740238     | BD Biosciences |
| CD106 (VCAM-1) | 429        | BV711        | 400      | 740675     | BD Biosciences |
| CD11b          | M1/70      | BV650        | 200      | 101259     | Biolegend      |
| CD11b          | M1/70      | BUV661       | 200      | 612977     | BD Biosciences |
| CD11c          | N418       | PE-Cy7       | 200      | 117318     | Biolegend      |
| CD11c          | N418       | BV570        | 200      | 117331     | Biolegend      |
| CD152 (CTLA-4) | UC10-4B9   | PE-Dazzle594 | 200      | 106318     | Biolegend      |
| CD157          | BP-3       | BV786        | 200      | 741012     | BD Biosciences |
| CD157          | BP-3       | APC          | 200      | 140208     | Biolegend      |
| CD19           | 6D5        | BV785        | 200      | 115543     | Biolegend      |
| CD19           | 6D5        | AF647        | 200      | 115522     | Biolegend      |
| CD21/35        | 7E9        | APC          | 200      | 123412     | Biolegend      |
| CD3            | 145-2C11   | BV785        | 200      | 100355     | Biolegend      |
| CD31           | MEC13.3    | BUV805       | 200      | 741939     | BD Biosciences |
| CD31           | 390        | PerCP-Cy5.5  | 200      | 102420     | Biolegend      |
| CD39           | 24DMS1     | PerCP-eF710  | 200      | 46-0391-82 | eBioscience    |
| CD4            | GK1.5      | BUV395       | 200      | 565974     | BD Biosciences |
| CD4            | GK1.5      | PE-Cy7       | 200      | 100421     | Biolegend      |
| CD40           | 1C10       | PE-Cy5       | 200      | 15-0401-82 | eBioscience    |
| CD44           | IM7        | BV711        | 200      | 103057     | Biolegend      |
| CD44           | IM7        | PE           | 200      | 103008     | Biolegend      |
| CD45           | 30-F11     | BUV496       | 200      | 749889     | BD Biosciences |
| CD45           | 30-F11     | APC-Cy7      | 200      | 103116     | Biolegend      |
| CD45.2         | 104        | AF700        | 200      | 109822     | Biolegend      |
| CD45.2         | 104        | BUV737       | 200      | 612778     | BD Biosciences |
| CD54 (ICAM-1)  | 3E2        | BV421        | 200      | 564704     | BD Biosciences |
| CD80           | 16-10A1    | FITC         | 200      | 104705     | Biolegend      |
| CD86           | GL-1       | BV510        | 200      | 105039     | Biolegend      |
| CD8 $\alpha$   | 53-6.7     | BUV395       | 200      | 563786     | BD Biosciences |
| CD8 $\alpha$   | KT15       | Pacific Blue | 200      | MCA609PB   | BioRad         |
| CD8 $\beta$    | YTS156.7.7 | APC          | 200      | 126614     | Biolegend      |
| FOXP3          | FJK-16s    | eF660        | 200      | 50-5773-82 | eBioscience    |
| FOXP3          | FJK-16s    | AF700        | 200      | 56-5773-82 | eBioscience    |



|                                          |             |              |      |            |                |
|------------------------------------------|-------------|--------------|------|------------|----------------|
| Granzyme B                               | GB11        | Pacific Blue | 200  | 515408     | Biolegend      |
| IFN $\gamma$                             | XMG1.2      | BV711        | 200  | 505836     | Biolegend      |
| Ki67                                     | 11F6        | AF488        | 200  | 151204     | Biolegend      |
| Ki67                                     | 16A8        | BV605        | 200  | 652413     | Biolegend      |
| Ly6A/E (Sca1)                            | D7          | BV510        | 400  | 108129     | Biolegend      |
| Ly6C                                     | AL-21       | PerCP-Cy5.5  | 200  | 560525     | BD Biosciences |
| MAdCAM-1                                 | MECA-367    | BUV615       | 200  | 751510     | BD Biosciences |
| MHC-I                                    | 24-14-8     | APC          | 200  | 17-5999-82 | eBioscience    |
| MHC-II (I/A-I/E)                         | M5/114.15.2 | eF450        | 200  | 48-5321-80 | eBioscience    |
| MHC-II (I/A-I/E)                         | M5/114.15.2 | BV480        | 200  | 566088     | BD Biosciences |
| NK1.1                                    | PK136       | BV421        | 200  | 108732     | Biolegend      |
| PD-1                                     | 29F.1A12    | BV510        | 200  | 135241     | Biolegend      |
| PDPN                                     | 36899       | PE-Cy7       | 800  | 127412     | Biolegend      |
| TCF-1                                    | S33-966     | PE           | 200  | 564217     | BD Biosciences |
| TCR $\beta$                              | H57-597     | BV785        | 200  | 109249     | Biolegend      |
| TER119                                   | TER-119     | APC-Cy7      | 200  | 116223     | Biolegend      |
| TIM-3                                    | RMT3-23     | PE-Cy7       | 200  | 119716     | Biolegend      |
| TNF $\alpha$                             | MP6-XT22    | BV650        | 200  | 506333     | Biolegend      |
| XCR1                                     | ZET         | PE           | 200  | 148203     | Biolegend      |
| XCR1                                     | ZET         | BV650        | 200  | 148220     | Biolegend      |
| Rat IgG2a, $\kappa$<br>(isotype control) | RTK2758     | PE           | 50   | 400507     | Biolegend      |
| CD16/32<br>(Fc block)                    | 93          | -            | 100  | 101302     | Biolegend      |
| Fixable Viability dye eF780              |             |              | 1000 | 65-0865-18 | eBioscience    |
| Fixable Viability dye Zombie NIR         |             |              | 500  | 423106     | Biolegend      |

**Supplementary Table 2.** Antibodies used for immunofluorescence.

| <b>Target</b>       | <b>Clone</b> | <b>Fluorochrome</b> | <b>Dilution</b> | <b>Reference</b> | <b>Distributor</b>     |
|---------------------|--------------|---------------------|-----------------|------------------|------------------------|
| aSMA                | 1A4          | Cy3                 | 1000            | C6198            | Sigma-Aldrich          |
| B220                | RA3-6B2      | eF450               | 200             | 48-0452-82       | eBioscience            |
| CCL19               | polyclonal   | -                   | 150             | BAF880           | R&D Systems            |
| CD31                | MEC13.3      | AF594               | 400             | 102520           | Biolegend              |
| CD4                 | RM4-5        | -                   | 300             | 100508           | Biolegend              |
| F4/80               | BM8          | AF647               | 200             | 123122           | Biolegend              |
| LYVE1               | ALY-7        | eF660               | 200             | 50-0443-82       | eBioscience            |
| PDPN                | 8.1.1        | -                   | 300             | 127402           | Biolegend              |
| Anti-Syrian hamster |              | AF488               | 1000            | 107-545-142      | Jackson ImmunoResearch |
| Anti-Syrian hamster |              | AF594               | 1000            | 307-585-003      | Jackson ImmunoResearch |
| Streptavidin        |              | AF647               | 1000            | 016-600-984      | Jackson ImmunoResearch |
